# Supplementary material
Source: PubMed Central journal article supplement (PMC6694219)
Supplement: EMBJ-38-e99266-s001.pdf [file EMBJ-38-e99266-s001.pdf]

## **Appendix**

### **Proteasomal degradation within endocytic organelles mediates antigen cross-presentation**

|                                |          |
|--------------------------------|----------|
| <b>APPENDIX FIGURE LEGENDS</b> | <b>2</b> |
| <b>APPENDIX FIGURE S1</b>      | <b>4</b> |
| <b>APPENDIX FIGURE S2</b>      | <b>5</b> |
| <b>APPENDIX FIGURE S3</b>      | <b>6</b> |
| <b>APPENDIX FIGURE S4</b>      | <b>7</b> |
| <b>APPENDIX TABLE S1.</b>      | <b>8</b> |

## Appendix Figure Legends

### Appendix Figure S1. Expression of Rab mutants does not alter the cell surface H2-K<sup>b</sup> levels or BMDC differentiation.

**A, B** Plasmids encoding GFP, GFP-Rab5ACA and GFP-Rab22ACA were expressed in BMDCs under the control of a TetON inducible promoter. BMDCs were cultured in Doxycycline (1 µg/ml) for 16hr after which cell lysates were analyzed by anti-GFP immunoblotting (**A**). Myc-Rab7ADN was expressed in BMDCs under the control of constitutive promoter and the expression was assessed by anti-Myc immunoblotting (**B**).

**C** IL-2 production by B3Z cells in response to paraformaldehyde-fixed BMDCs pulsed with varying doses of SIINFEKL peptide for 1hr prior to fixation.

**D** Cell surface H2-K<sup>b</sup> levels of BMDCs expressing Rab5ACA, Rab22ACA and Rab7ADN were assessed by flow cytometry.

**E** Cell surface expression of CD11c was determined to analyze the effect of the Rab mutants on BMDC differentiation.

Data Information: In C, representative experiments are shown for each Rab mutants expressed in BMDC. The mean±SD of assay triplicates are plotted.

### Appendix Figure S2. Cell surface expression of hβ2m in BMDCs.

A-C Cell surface expression of transduced human β2-microglobulin (hβ2m) on wild-type and TAP1<sup>-/-</sup> BMDCs expressing GFP, GFP-Rab5ACA (**A**), GFP-Rab22ACA (**B**) and Rab7ADN (**C**) was evaluated by flow cytometry using the monoclonal antibody, BBM.1.

**Appendix Figure S3. Representative Immunoelectron microscopy images.**

**A** Immunoblot analysis of WT and LMP2 knockout MEF cells using anti-LMP2 antibody.

**B** Five representative images captured by TEM of double immunogold labeling of BMDC, WT MEF and LMP2 KO MEF with anti-LMP2(15nm) and anti-LAMP1(5nm) (Bar 500nm).

**C** Five representative images of double immunogold labeling of BMDC with antibodies(15nm) raised against  $\alpha 5$ ,  $\beta 5$  and 19S S2 subunits of proteasomes, respectively, and anti-LAMP1(5nm) (Bar 500nm).

**Appendix Figure S4. Proteasomes remain associated with purified latex beads post membrane solubilization by Triton X-100.**

**A** Phagosomes isolated from 293T-FcR-K<sup>b</sup> expressing empty vector or Rab mutants were incubated with 0.5% Triton X-100 in PBS on ice for 15min.

Residual proteasomes associated with the latex beads or proteasomes released into the supernatant were detected by immunoblotting for the  $\beta 5$  subunit. The efficiency of membrane solubilization was assessed by immunoblotting for the lysosomal membrane protein LAMP1.

**B** The gating strategy used to identify intact phagosomes to measure the proteasome dependent degradation of Alexa647-OVA. Based on FSC-SSC the bead population was identified. OVA negative gating defines the intact phagosomes.

# Appendix Figure S1

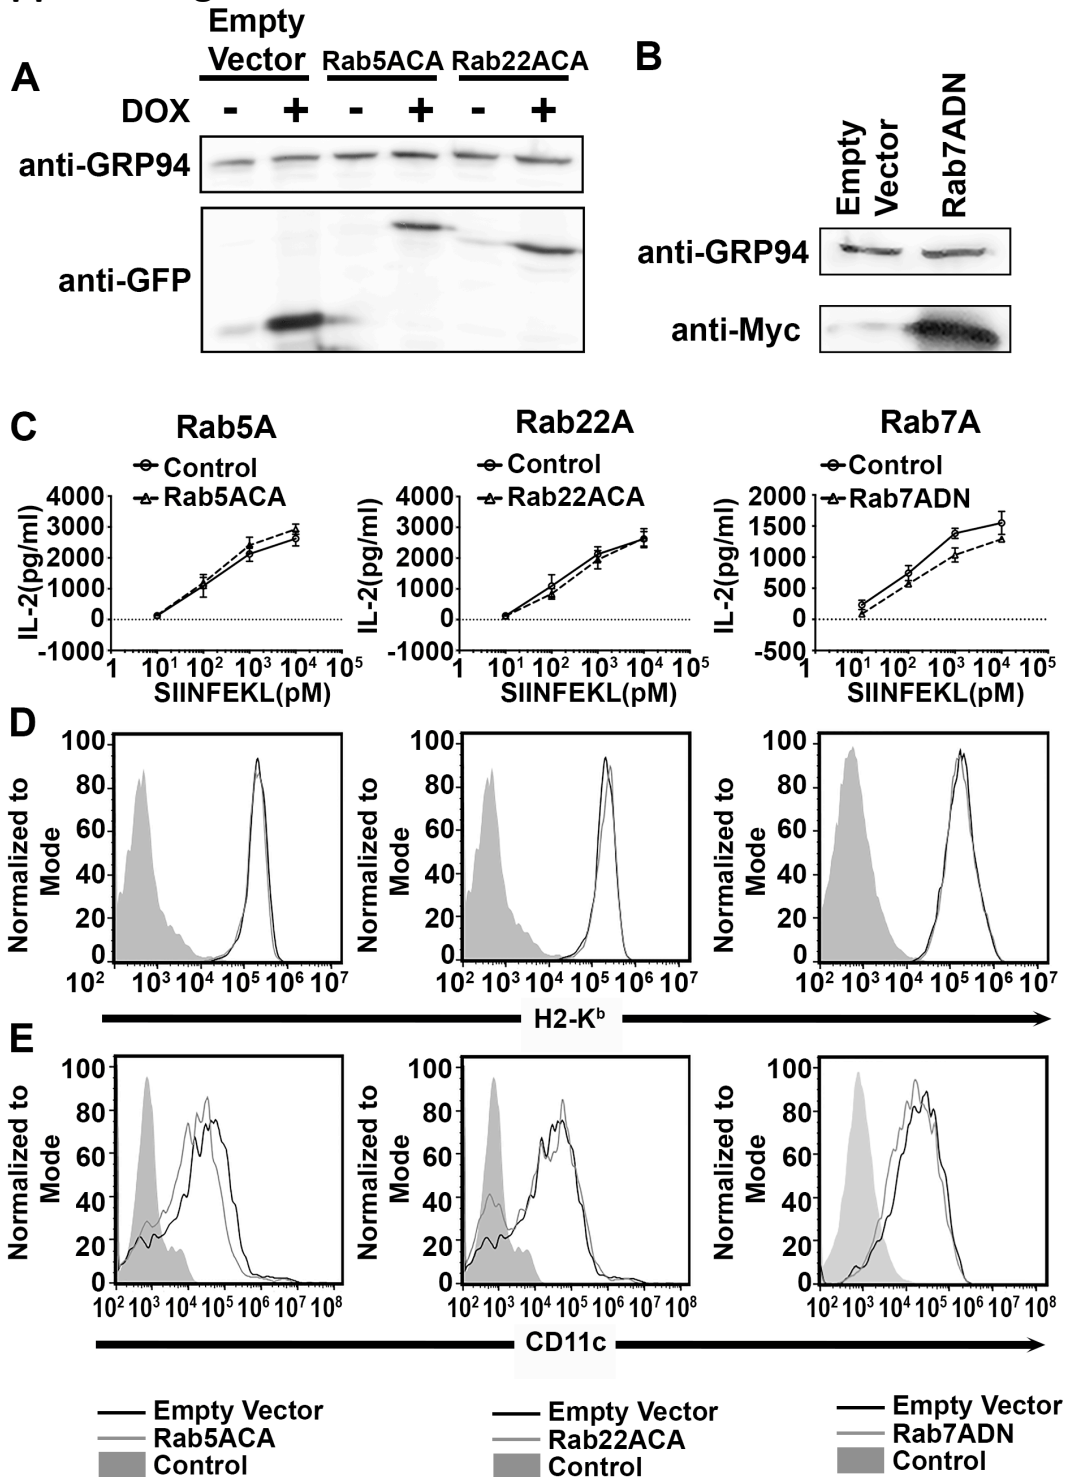

Appendix Figure S2

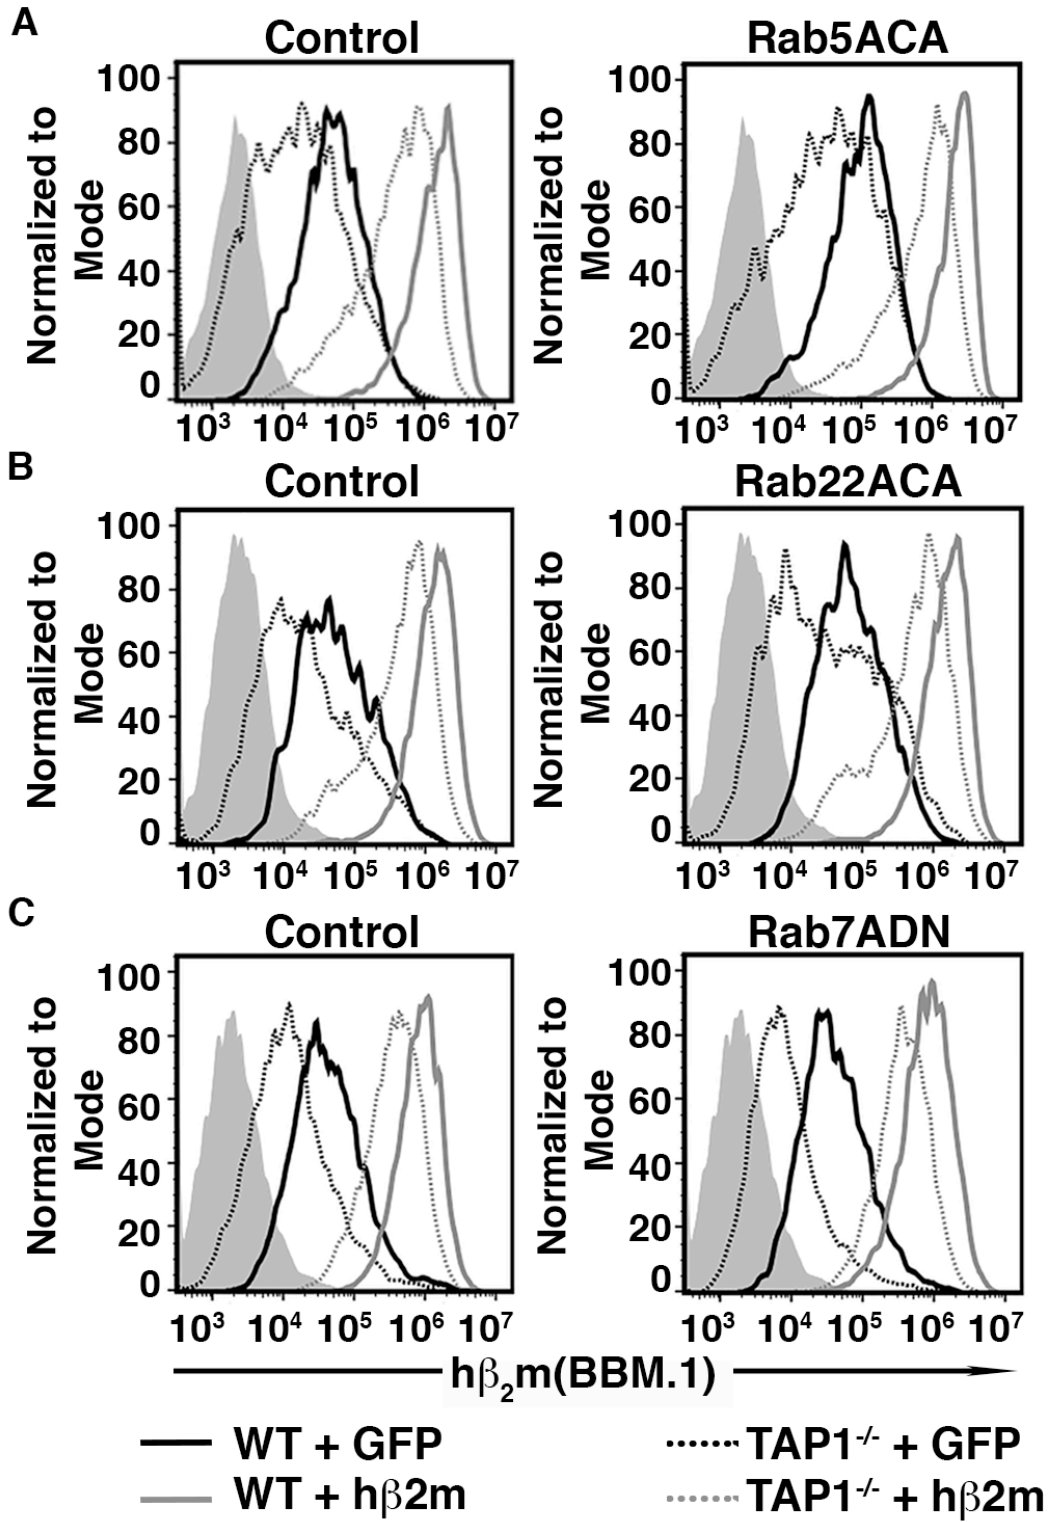

### Appendix Figure S3

A

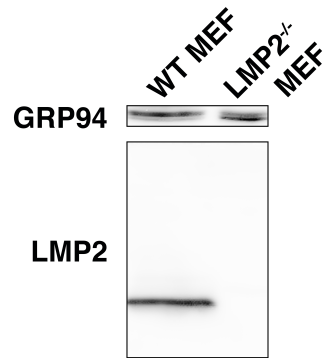

B

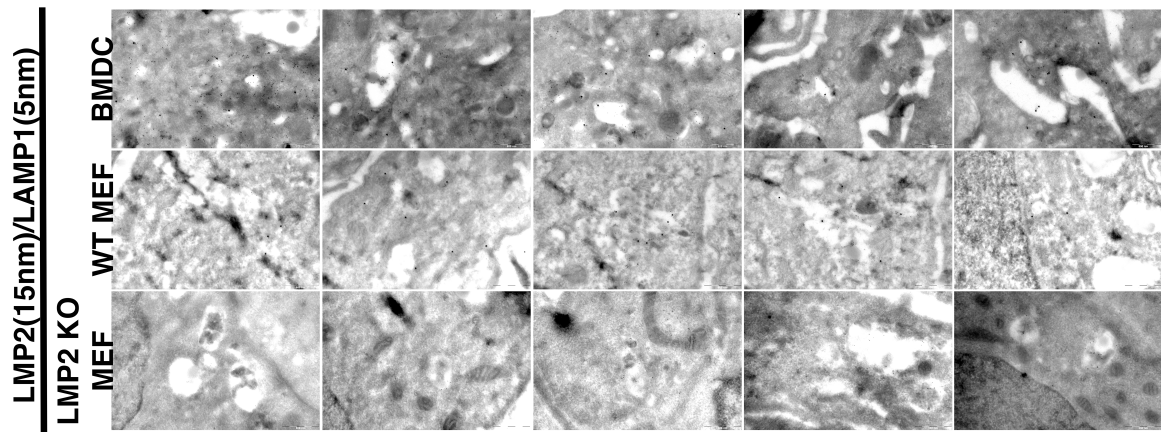

C

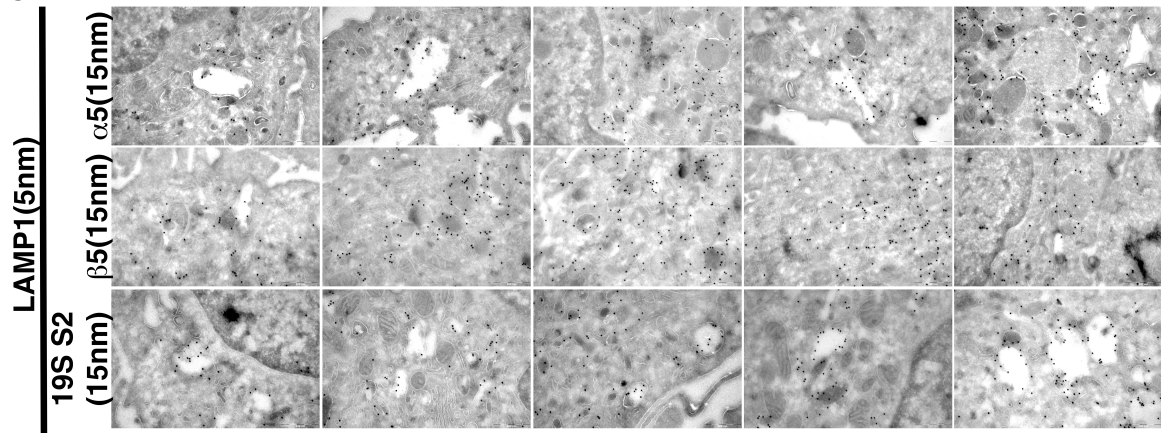

Appendix Figure S4

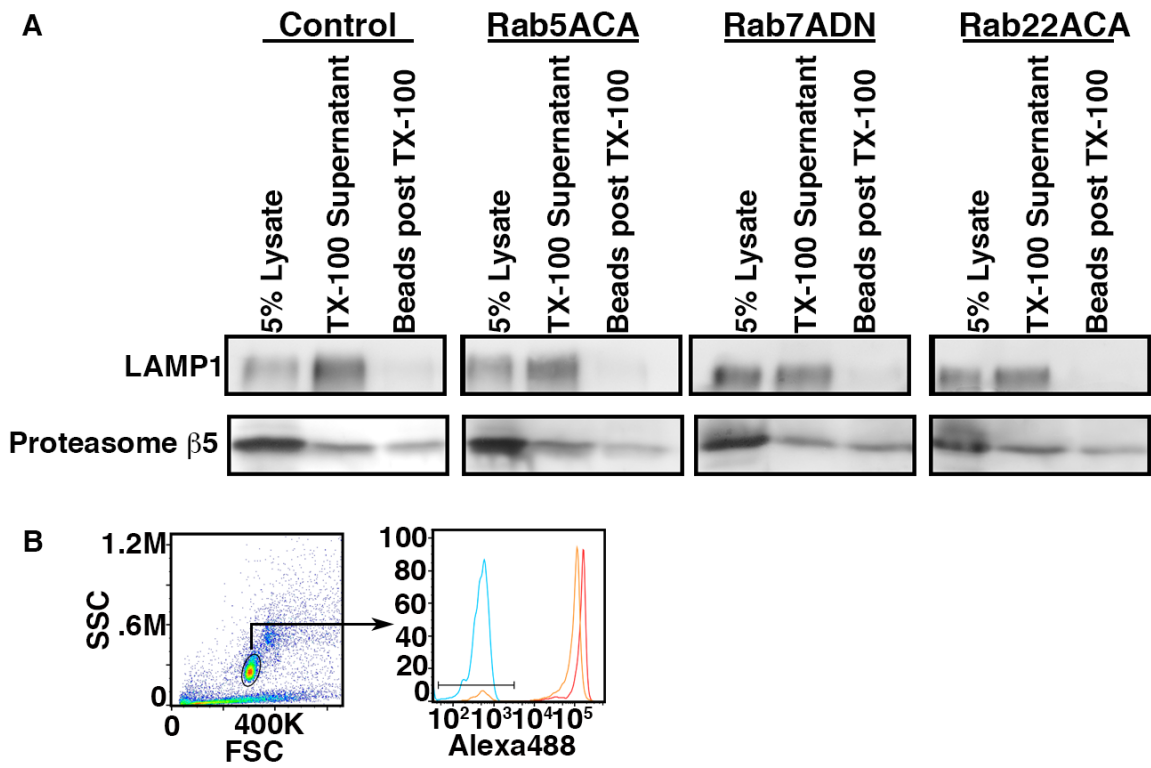

**Appendix Table S1.****Raw data analyzed to generate proteasome activity curve in Fig 6A.**

Empty Vector

|            |      |             |             |       |
|------------|------|-------------|-------------|-------|
| ATP        | -    | -           | +           | +     |
| Epoxomicin | -    | +           | -           | +     |
| 0hr        | 4547 | 4514.000001 | 4287.000001 | 4278  |
| 1hr        | 4523 | 4384.000002 | 8977.999997 | 8716  |
| 2hr        | 7351 | 7438.000003 | 10600       | 12898 |
| 3hr        | 7238 | 6433.000002 | 18324       | 12172 |

Rab5ACA

|            |             |       |             |       |
|------------|-------------|-------|-------------|-------|
| ATP        | -           | -     | +           | +     |
| Epoxomicin | -           | +     | -           | +     |
| 0hr        | 5038.745237 | 5182  | 5013.999998 | 4818  |
| 1hr        | 6891.584213 | 6955  | 16092       | 9460  |
| 2hr        | 9942.682771 | 10062 | 24030       | 12920 |
| 3hr        | 10383.55741 | 10140 | 25000       | 13728 |

Rab22ACA

|            |             |       |             |       |
|------------|-------------|-------|-------------|-------|
| ATP        | -           | -     | +           | +     |
| Epoxomicin | -           | +     | -           | +     |
| 0hr        | 5550.999998 | 5643  | 5336        | 5224  |
| 1hr        | 7172.000001 | 6229  | 20340       | 9699  |
| 2hr        | 8723.000001 | 12122 | 35959.99999 | 18189 |
| 3hr        | 12713.99999 | 13230 | 46065.99999 | 21620 |

Rab7ADN

|            |             |      |       |       |
|------------|-------------|------|-------|-------|
| ATP        | -           | -    | +     | +     |
| Epoxomicin | -           | +    | -     | +     |
| 0hr        | 5210        | 5433 | 4936  | 4790  |
| 1hr        | 6857.000002 | 6034 | 16732 | 6782  |
| 2hr        | 8430.999996 | 9100 | 30510 | 11323 |
| 3hr        | 9141.000004 | 9381 | 37180 | 13224 |
